# Supplementary material for: Epigenetic silencing of microRNA-203 is required for EMT and cancer stem cell properties
Source: PubMed Central journal article supplement — Sci Rep. 2013 Sep 18;3:2687. doi: 10.1038/srep02687 (PMC3776231; doi:10.1038/srep02687), 2013-09-18
Supplement: srep02687-s1.pdf [file srep02687-s1.pdf]

Epigenetic silencing of microRNA-203 is required for EMT and cancer stem cell properties

Joseph H. Taube<sup>1,2</sup>, Gabriel G. Malouf<sup>3,4</sup>, Emily Lu<sup>5</sup>, Nathalie Sphyris<sup>1,2</sup>, Vidya Vijay<sup>1,2</sup>, Priyanka P. Ramachandran<sup>1,2</sup>, Katumasa R. Ueno<sup>1</sup>, Sanchaika Gaur<sup>1</sup>, Milena S. Nicoloso<sup>6</sup>, Simona Rossi<sup>6</sup>, Jason I. Herschkowitz<sup>7</sup>, Jeffrey M. Rosen<sup>7</sup>, Jean-Pierre J. Issa<sup>8</sup>, George A. Calin<sup>6</sup>, Jeffrey T. Chang<sup>5,9</sup>, Sendurai A. Mani<sup>1,2,\*</sup>

Figure S1 (Taube et al.)

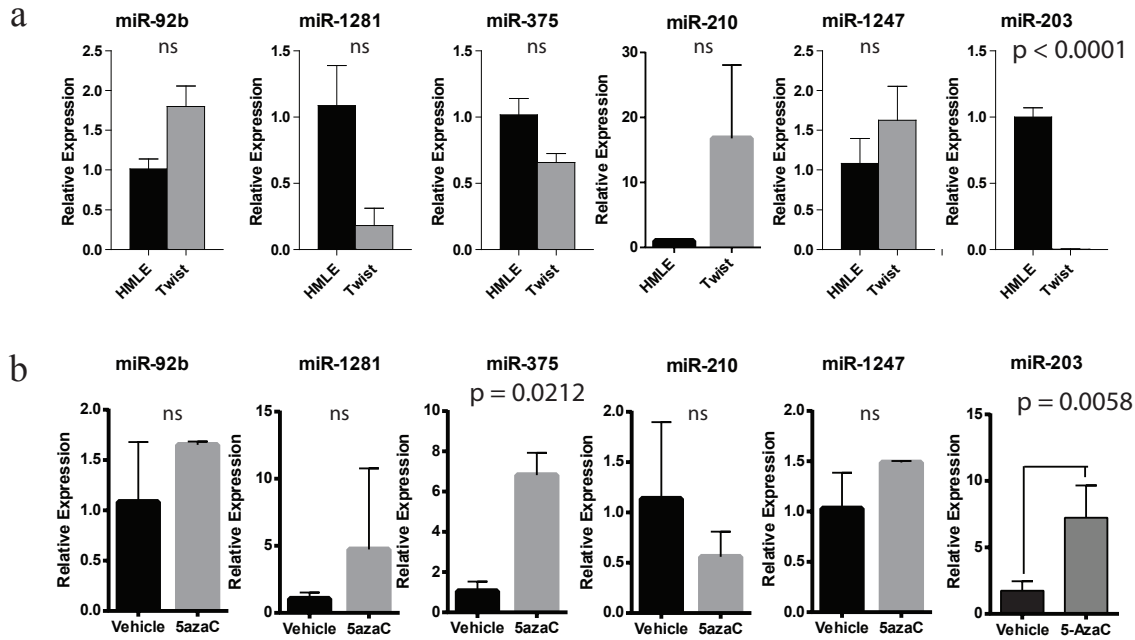

Figure S1 – Expression of other microRNAs with changes in promoter DNA methylation

Expression of indicated microRNAs was determined in HMLE control and HMLE Twist cells by Taqman quantitative PCR. Levels were normalized to sno-U6.

Figure S2 (Taube et al.)

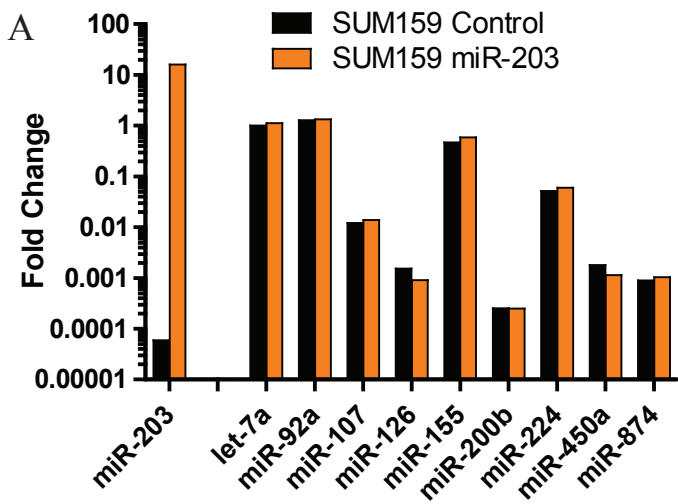

Figure S2 – Expression of other microRNAs is unchanged by miR-203 over-expression

Relative levels of indicated microRNAs were quantified by Taqman quantitative PCR from RNA extracts of control and miR-203 expressing SUM159 cells. Levels were normalized to sno-U6 and graphed relative to let-7a in control cells.

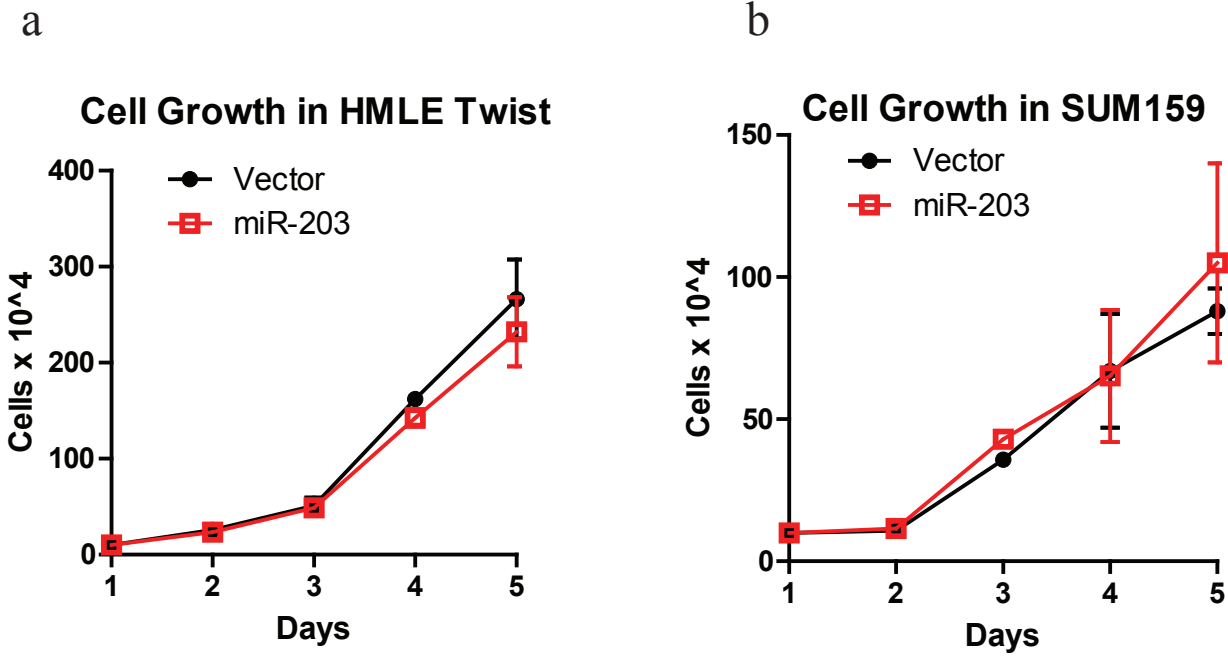

Figure S3 – miR-203 expression does not significantly affect cell growth rates

Cells were counted after the specified number of days in culture for both HMLE Twist (a) and SUM159 (b) cells with either a control vector or miR-203.

Figure S4 (Taube et al.)

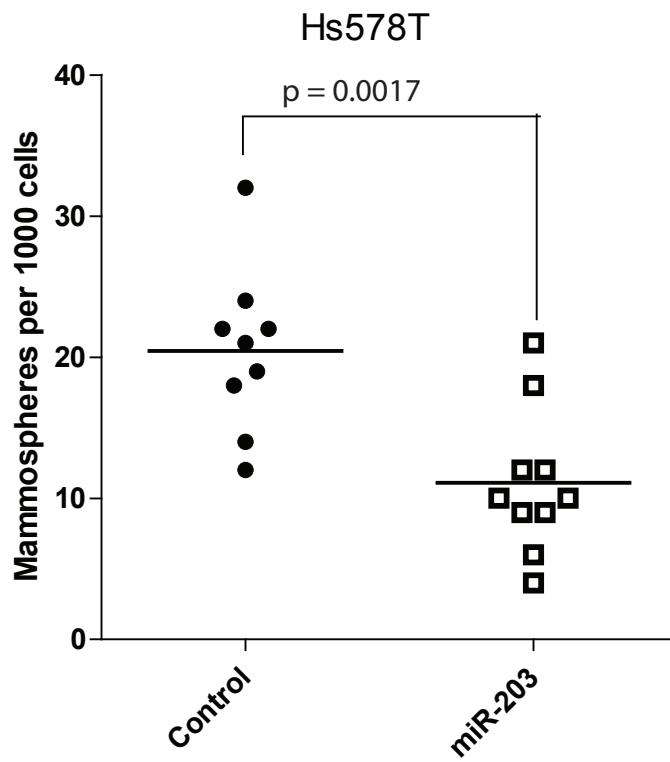

Figure S4 – miR-203 expression reduces mammosphere formation in Hs578t cells

Hs578t cells with either a control vector or expressing miR-203 were plated for mammosphere formation and spheres which formed after 10 days were counted.

Figure S5 (Taube et al.)

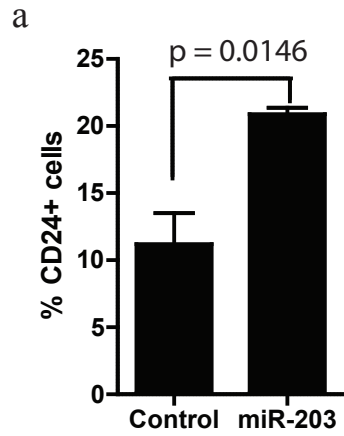

Figure S5 – miR-203 expression increases CD24 cell surface expression

CD24 cell surface expression was quantified by FACS in control vector and miR-203 expressing SUM159 cells. The experiment was performed in triplicate.

Figure S6 (Taube et al.)

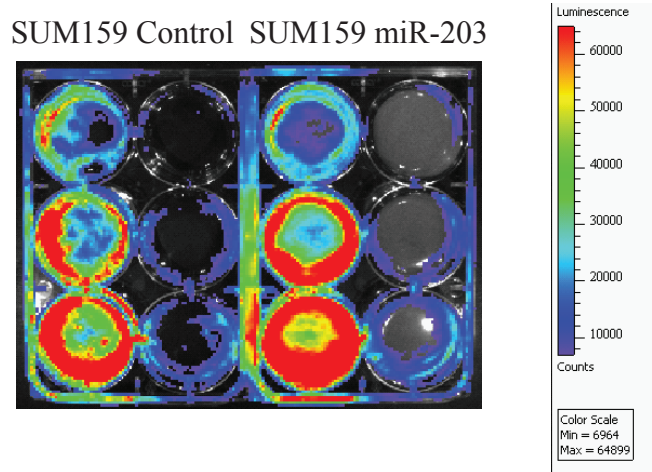

Figure S6 – Luciferase activity is statistically equivalent between control and miR-203 expressing SUM159 cells

SUM159 cells with either a control vector or expressing miR-203 were transduced with a retrovirus expressing both RFP and luciferase and sorted for RFP expression. A 2-fold serial dilution of cells was plated in a 6-well plate and luciferase activity was measured after adding luciferin.
